# Supplementary material for: Ethnocultural adaptation of an effective health-promoting intervention for Punjabi-speaking older adults: Choose to Move ਆਓ ਚਗ ਸਹਤ ਵਲ ਚਲਏ
Source: Research Square preprint supplement (doi:10.21203/rs.3.rs-8264715/v1), 2026-01-08
Supplement: Supplementary file 1 [file 3d5fb78fb1a4696a2db1e26e.docx]

**Step 2 interview guide** used during focus group with community-based organizations identified in Step 1 of the adaptation process.

**Part 1. CTM PROGRAM COMPONENTS**

**PROGRAM MATERIALS**

| **OVERVIEW** | **QUESTIONS** |
| --- | --- |
| ***Group Meeting One***  The objectives of the first group meeting are to:   1. Provide participants the opportunity to meet and get to know one another, and build excitement for the months ahead 2. Give participants a brief overview of Choose to Move (i.e., Choose to Move principles, meeting schedule, topics and format) 3. Discuss goal setting, give participants time to think about their goals, and begin to create an action plan 4. Help participants identify and discuss how to overcome obstacles they may encounter in pursuit of their goals, so that they can start planning ways to overcome them.   The following materials are used in group meeting one.   Tell me About Yourself   Get Active Questionnaire |  |
| ***One-On-One***  The objectives of the one-on-one are:   1. Participants meet with an activity coach, one-on-one, for 30 minutes after the first group meeting to:  - Set physical activity* and social goals and create an action plan. - Choose activities that they want to do, are available in their community, and make sense for them based on their interests, abilities, and resources.   The following materials are used in the one-on-one.   My Action Plan Part 1 – *provide examples from binder*  *Activities can range from traditional fitness class-type activities to more individual and self-organized activities (e.g., walking, gardening) to learning how to weave more movement opportunities throughout the day. | - Would a one-on-one setting appeal to the target population? (e.g., what about one-on-one vs group) - Do you see anything that needs to be modified? If yes, what? - Are the questionnaires, forms, and worksheets relatable for the target population? |
| ***Group meetings (2-8)***  The objectives of the group meetings are:   1. Social connections between participants facilitated by meeting activities (e.g., ice breakers, group check-ins and discussions, movement breaks). 2. Problem solving, motivation, and accountability to goals/action plans, achieved by discussions with the activity coach and other participants. 3. Education on a specific topic; examples include falls prevention, nutrition, stress and anxiety management, physical activity.   *Sample agenda:*   - Icebreaker activity - Group/peer check-in - Movement break - Topic discussion - Movement break - Resource sharing - Group challenge   Activity coaches are provided all the materials they need to deliver Choose to Move, including:   Group meeting guides/slides; - *provide examples from binder*   - select 8 topics from a menu of 20+    Attendance record   Delivery checklist   Group meeting summaries | After reviewing the overview of the group meetings:   - Do you see any potential modifications that would be required for the group meetings to work in your organization and for your target population? - What might those modifications look like - ……altered timeline, duration, content, group size? - …. altered format of delivery (i.e., online, radio, or telephone)? - What topics would interest your target population? |

**Part 2: DELIVERY SUPPORT**

1. **PRE-DELIVERY SUPPORT**

| ***OVERVIEW*** | **QUESTIONS** |
| --- | --- |
| ***Recruitment/ referral resources and planning support***  Our support team will work with your organization to recruit Choose to Move participants. Support can include:   - Choose to Move Overview module - Promotion and Recruitment online training module - Recruitment strategy brainstorming - Providing promotional material templates (e.g., posters) – *provide examples from binder*    Poster template   Rack card template   Referral letter   News release   - Sharing information about your programs on our website and with our referral network | - If we’re trying to recruit a group of Punjabi/Hindi speaking older women, what things MUST be considered for **recruitment**? - What strategies have you used in your organization to encourage this population to join your programs previously? |
| ***Screening and Registration***  We provide a screening tool to ensure registrants are eligible to participate (e.g., self-identify as inactive and an older adult)   Screening tool - *provide examples from binder* | - Are there other eligibility criteria that would be important to consider for this population (e.g., language, gender)? |
| ***Information Session/Intake conversations***  The objectives of the information session are to:   1. Help potential participants understand what Choose to Move is 2. Generate some excitement and interest about getting involved in Choose to Move 3. Reinforce eligibility criteria and conduct a secondary screening to ensure only eligible participants register for Choose to Move 4. Distribute and collect the *Get Active Questionnaire*. Tell participants how to get help completing their *Get Active Questionnaire*, if needed.   The following materials are used in the information sessions:   Info session slides | - Would an information session like this work for your organization? - Do you see anything that needs to be modified? If yes, what? |
| ***Activity coach hiring support (if needed)***  Our support team will also provide you with resources if you need to hire an activity coach. Activity coaches have varied backgrounds. All activity coaches have experience working with older adults and are aware of supports and services available in their community. A fitness background is not required. Organizations can train existing staff or hire for the position.  Resources our support team provides include:   Activity coach hours estimator   Sample activity coach job description- *provide examples from binder* | - Who do you anticipate would serve in the activity coach role within your organization? - Would you need to hire someone? - Is support with the hiring process something that you would find helpful? |
| ***Activity coach training***  Our support team will train all activity coaches to deliver Choose to Move. Training takes place online (~7h to complete) and includes modules that cover:   - Choose to Move Overview - Promotion and recruitment - Program delivery - Motivational interviewing, facilitation and group management skills - Fitness and behaviour change basics for those without fitness backgrounds (optional module) - Considerations for different conditions (e.g., arthritis, hypertension) (optional module) - Virtual delivery (only for programs delivered virtually)   Once online training is complete, activity coaches complete a one-hour Q&A call with a member of the support team. | - What characteristics would an activity coach need to serve this population effectively? - What (if any) additional training would a new activity coach need to serve [*target population*] older adults in your organization? - Do you have suggestions for how the activity coach training could be modified to be more relevant for a staff member within your organization? |

1. **ONGOING SUPPORT**

| **OVERVIEW** | **QUESTIONS** |
| --- | --- |
| ***Ongoing support***  The support team is available to answer any questions throughout the duration of the delivery agreement. The support team will schedule regular check-in calls with the activity coach during the first program (monthly), then as needed. | - Based on what you’ve heard about Choose to Move so far, does this sound like it would work? - How does this compare to the support you receive for other programs you offer? |
| ***Community of practice***  The support team also hosts community of practice calls via Zoom with those involved in Choose to Move delivery (e.g. activity coaches) across organizations. This is an opportunity for activity coaches and organizations to share their experiences with and learn from each other. Calls occur approximately every 3 months for one hour. |  |

**Step 2 interview guide** used during interviews with Punjabi-speaking older adults who completed the Choose to Move (CTM) Phase 4 program delivered to Punjabi-speaking older adults prior to the formal adaptation process. [AC=activity coach]

Today we will walk you through the various aspects of the program. As we go, we would like you to tell us your thoughts on Choose to Move. We will use the information we hear to develop an adapted program for Punjabi-speaking older adults.

**CTM PROGRAM**

| **Question asked** | **Items to probe for** |
| --- | --- |
| *Meinu tusi das sakde ho ki tusi CTM program ch kyun bhaag leya?*   - *Info session ch aake* - *Tuhadi jaan pehchaan [name] karke*   Can you tell me why you chose to participate in CTM?   - Being at the info session - Your acquaintance with your AC | - Info session - Relation with the coach? *Two-year relationship with AC – did this impact their decision to participate?* - location, gender-specificity, importance of food/utility activities/transportation needs, focus on fun/education, incorporating cultural aspects (e.g., music), movement component, cohort approach. |

**ONE-ON-ONE**

| **Question asked** | **Items to probe for** |
| --- | --- |
| 2. *Jad CTM shuru hoya, tusi ACt naal gal kithi si phone te, eh tuhadi 1:1 meeting si. Tusi das sakde ho ke oh meeting kive si?*  When CTM started, you spoke with AC on the phone, this was your 1:1 meeting. Can you tell me how that meeting was for you?  *Tuhanu es phone call di sab to vadiya cheez ki lagi? Tuahnu phone call di keri cheez eni vadia nahi lagi?*  What thing did you like the most about this phone call? What did you not like as much about the phone call?  *Es meeting vich action plan banaun leyi kive lagi? Phone te kale gal karke teek lagya action plan banaun leyi ya eh group vich karna chahida?*  How did you like making an action plan in this meeting? Was it okay to make the action plan over the phone individually/alone or should this happen in the group? | - What did you like most about this phone call? What did you like least? - How did meeting with AC one-on-one to make an action plan work for you? What worked? What did not? (e.g., what about one-on-one vs group) - Did you create an action plan? What did that look like?   - What activities did you choose to help you meet your goals?   *Tusi action plan banaya? Tuhade action plan dekhan vich kive lagda? Tusi keri activities/gatividhian chunniya apne goals/teeche nu milan leyi?*  Did you make an action plan? What did your action plan look like? Which activities did you choose to meet your goals? |
| 3. *CTM de vich asi goal setting athe isdi ehmyath baare dasde ha. Goal setting har ek jaane nu shayad nahi patha ya nahi samaj. Tuhanu samaj hai? Tusi koshish karu meinu dasan di ke goal setting ki cheez hai?*  In CTM goal setting and its importance is talked about. Not everyone knows or understands goal setting. Do you understand what goal setting is? Can you try to explain what goal setting is? |  |

**GROUP MEETINGS (1-8)**

| **Question asked** | **Items to probe for** |
| --- | --- |
| *Apni 8 group meetings si es program vich. Tusi das sakde ho es meetings baare?*   - *Tuhanu es group meetings baare changa ki lagya* - *Tuhanu es group meetings baare kin nahi changa lagya?*   We had 8 group meetings in this program. Can you tell me about these meetings?   - What did you like about these meetings? - What did you not like about these meetings? | - Were there any topics you found interesting? Those you did not? Was there something you wish had been covered? - How could the meetings be improved? (e.g. translation of slides into Punjabi? More images?) - Did you do any activities? Group discussions? Movement breaks? Ice breakers? Group challenges? - What would make CTM more engaging for you? ……altered timeline, duration, content, group size? (e.g., tea/snack breaks) |

**CONCEPT OF CTM**

| **Question asked** | **Items to probe for** |
| --- | --- |
| *Je tusi apni koi friend ya rishtdaar nu dasna hove CTM baare, tusi kime dasonge athe ki dasonge? Eh program ki ya?*  If you were to tell a friend or relative about CTM, how would you tell them and what would you tell them? What is this program? | - What do you think is the intent of the CTM program? - To gain independence? Does this concept even make sense? - Is being independent even more important to you/what does “independence” mean to you? - Preference for prescriptive activities vs they choose themselves (e.g., dig into the ‘handholding’) |
| *Tusi Punjabi community nu, khaas tor te Punjabi aurtan nu dasonge CTM baare athe sujjha doenge CTM ch bhaag len leyi?*  Would you tell the Punjabi community, especially Punjabi women about CTM and would you suggest they participate in CTM? |  |
| *Jad tusi sunde ho shabd, independence, tuhanu ki lagda, eh ki hai?*  When you hear the word independence what do you think it is?  Another word to try: *apne bal boothe te kuch karna*  Doing something on your own/being capable of doing something on your own merit | - Is there a certain point (e.g., certain age) when you want family/care partners to be involved?   *Koi eho jehi umar ya halaat han jad tuhadi parivaar ya tiyaan rakhan vale hone chahide?*  Is there a certain age or situation when your family or care takers should be there?   - Who would you want involved in your care on a daily basis?   *Apne rojan din vich tusi kis nu mangogey tuhadi dekh bal leyi?*  In your every day, who would you want for your caretaking/taking care?   - Do you have certain expectation (rooted in your Punjabi cultural background, for example) regarding the involvement and/or the level of involvement of your family members (or others) in your day-to-day care?   *Apne Punjabi shabychaar de udhaar te, tuhade koi umeedan han ke tuhada parivaar yah or lok shaymal hon tuhadi dekh bal te tiyaan rakhan vich?*  Based on our Punjabi culture, do you have any expectations that your family or other people to take part in your care taking. |

## **Interview guide:** Activity coaches, Step 6 of the adaptation process, following delivery of the first Choose to Move program adapted for Punjabi-speaking older adults

| We created an adapted model for Punjabi-speaking older adults, what did you think of the adapted version of Choose to Move for this population?   - *Probe: likes/dislikes* - *Probe: feasibility/ acceptability* - *Probe: self-efficacy of delivery*   Do you think Choose to Move needs any modifications/changes overall to make it more suitable for [target population] 55+? What kind of changes?   - *Probe: adaptations: appropriateness: literacy, cultural relevance, components, materials*   Can you tell me about any modifications you made to the program as you delivered it? (refer to survey responses)   - *Probe: fidelity/adaptations* |
| --- |
| I would like you to think back to when you were first told about Choose to Move and hired to deliver the program. Can you tell me what that process looked like for you?   - *Probe: feasibility/ acceptability* - *Probe: self-efficacy of delivery*   *Prepare to deliver*  What challenges arose when you were preparing to deliver Choose to Move?   - *Probe: time commitment (e.g., amount of time it took to run the program; adjusting timing of sessions, phone call/text reminders to participants)*   What helped you the most as you prepared to deliver Choose to Move?   - *Probe: Administration/prep*   - Did you have an appropriate # of hours allocated to prepare for Choose to Move? Do you think this will change for your next program? - *Probe: Training*   - Was the training (content) presented at an appropriate level? Was anything missing?   - Was the total length of training too short/just right/too long   - Did you feel you had all you needed to deliver Choose to Move (*self efficacy)*   - Would anything improve training? - *Probe: Recruitment of older adults*   - How did recruitment go for your first program?   *Support during delivery*  What helped you the most when you delivered Choose to Move?  What challenges arose during Choose to Move delivery?   - *Probe: Administration/prep*   - Did you have an appropriate # of hours allocated to deliver Choose to Move? Do you think this will change for your next program? - *Probe: CTM materials (e.g. slides), ongoing meetings with HB and CH?* - *Probe: Support provided by HB and CH?* |

## **Interview guide:** Delivery partner organizations, Step 6 of the adaptation process, following delivery of the first Choose to Move program adapted for Punjabi-speaking older adults

##

| Overall, do you have any thoughts about how the partnership development process went? Do you have any ideas for improvement?   - - - Probe: How did you feel about the volume of contact with our team?   If we had to replace some of the one-on-one contact with our team with online tools/resources, is there anything you would suggest?  What do you think about a web-platform to use through the partnership development process?   - - - What features would be important?     - What would make you use it?     - What would make you NOT want to use it?   What did you think of the initial **partnership engagement** phase where you first learned about Choose to Move? Could it be improved? Was anything unnecessary?   - - - Probe – existing resources:       - Webinar link       - 2-page summary       - Choose to Move video       - Expression of interest form       - Initial meeting     - Probe – additional/altered resources:       - Ideas from partner       - Intro video       - Snapshot of other organizations       - Map/list of other delivery organizations       - Overview of partnership process   What did you think of the Choose to Move **partnership development/contracting** process? Could it be improved? Was anything unnecessary?   - - - Probe: existing resources:       - Agreement template       - Budget/HR planning tool       - Conversations re: expectations, adaptations, reach, budget, funding installments, reporting, support, training     - Probe: additional/altered resources       - Ideas from partner   What did you think of the Choose to Move **preparation** process? Could it be improved? Was anything unnecessary?   - - - Probe: existing resources:       - Sample activity coach job description       - Onboarding meeting       - Activity coach training modules       - Overview training module       - Promotion jumpstarter module       - Promotion/recruitment resources     - Probe: additional/altered resources       - Ideas from partner       - FAQ?   What did you think of the Choose to Move **delivery** process? Could it be improved? Was anything unnecessary?   - - - Probe: existing resources:       - Communication with Choose to Move support team       - Choose to Move support team sharing information about program on communication channels       - Community of practice calls       - Partner reporting template       - Check-in call with support team     - Probe: additional/altered resources       - Partner ideas       - Pre-program details form       - Pre-program details confirmation form       - Program check-in form |
| --- |
| And lastly, we created an adapted model for Punjabi-speaking older adults, what did you think of the adapted version of Choose to Move for this population?   - Probe: likes/dislikes - Probe: feasibility/ acceptability - Probe: self-efficacy *of delivery*   How does Choose to Move compare to similar existing programs in your setting?   - Probe: relative advantage   Are there any major challenges your organization needs to overcome to continue to deliver Choose to Move?   - Probe: context, appropriateness, sustainability   How does offering Choose to Move fit with the strategic direction of your organization moving forward?   - Probe: context, appropriateness,   Now that your organization has delivered 1 program of the adapted model to Punjabi-speaking aduls 55+, are there any changes you would recommend making the program AND/OR the administration around the program better?  Do you have any final thoughts or reflections you would like to share before we close? |
