# Supplementary material for: Ethnocultural adaptation of an effective health-promoting intervention for Punjabi-speaking older adults: Choose to Move ਆਓ ਚਗ ਸਹਤ ਵਲ ਚਲਏ
Source: Research Square preprint supplement (doi:10.21203/rs.3.rs-8264715/v1), 2026-01-08
Supplement: Supplementary file 2 [file 8b6604c1f60335f0bd99dec9.xlsx]

## Sheet: FRAME & FRAME-IS Coding
Adaptation step	CTM Phase 4	Challenge encountered / feedback received / cultural knowledge based on lived experience	Proposed adaptation to CTM Phase 4 model	bundled/complex OR simple change idea (step 3: identify simple versus complex change ideas)	Adaptation affects implementation strategy (IS), evidence-based intervetion (EBI) or BOTH	Module 2 - WHAT is modified (FRAME: Content, Contextual, Training and Evaluation; FRAME-IS: Content, Evaluation, Training, Context)	Module 2b - If context is changed, specify which of the following was modified: Format, Setting, Personnel, Population, Other	Module 3 - WHAT is the nature of the adaptation?	Module 3b - Relationship of adaptation to fidelity/core function(s)	Module 4a - What is the GOAL of the adaptation?	Module 4b - What is the LEVEL of the rationale of the adaptation?	Module 4c - What are the REASONS for the adaptation (sociopolitical / organization / provider / recipient) (applicable to EBI adaptations only)	Module 5a - WHEN is the adaptation initiated?	Module 5b - Is the adaptation PLANNED?	Module 6 - WHO participates in the decision to adapt?	Module 7 - How WIDESPREAD is the adapation? (IS only)	Adaptation went as planned	Final decision on proposed adaptation
Updates to the original CTM Phase 4 model
0	Activity coach training modules hosted at www.choosetomovetraining.info	Different websites for activity coach training and general CTM content	Host activity coach training on main CTM website (https://choosetomove.ca)		IS	Context	Format	Tailoring/tweaking/refining	Fidelity consistent	Increase acceptability, appropriateness and/or feasibility of the implementation effort	Implementer level (CSU) Clinician level (AC)	N/A	Pre-implementation/planning/pilot phase	Planned/proactive	Implementer or implementation strategy expert (ST) Program leader, manager or administrator (AAS)	Implementation/facilitation team (CSU) Network system/community (all ACs)	Yes	Incorporated into CTM Phase 4 model
0	CTM materials (e.g., group meeting slides) stored on Dropbox	CTM materials in different locations	CTM materials available to download from the CTM website		IS	Training and/or evaluation	N/A	Tailoring/tweaking/refining	Fidelity consistent	Increase acceptability, appropriateness and/or feasibility of the implementation effort	Implementer level (CSU) Clinician level (AC)	N/A	Pre-implementation/planning/pilot phase	Planned/proactive	Implementer or implementation strategy expert (ST / Project team)	Implementation/facilitation team (CSU) Network system/community (all ACs)	Yes	Incorporated into CTM Phase 4 model
0	Supplementary CTM resources available on separate ‘tools and resources’ page on activity coach training site	Supplementary resources not easily accessible for activity coaches	Embed supplementary resources within relevant training module on CTM website		IS	Training and/or evaluation	N/A	Tailoring/tweaking/refining	Fidelity consistent	Increase acceptability, appropriateness and/or feasibility of the implementation effort	Clinician level (AC)	N/A	Pre-implementation/planning/pilot phase	Planned/proactive	Implementer or implementation strategy expert (ST / Project team)	Network system/community (all ACs)	Yes	Incorporated into CTM Phase 4 model
0	Separate versions of CTM materials available for large and small DPOs due to small differences in delivery/evaluation approaches.	• High administrative burden on CSU to update and maintain materials • Confusion for ACs and DPOs around document versions.	One set of CTM materials for all DPOs regardless of DPO size.		IS	Training and/or evaluation	N/A	Changes in packaging or materials	Fidelity consistent	Increase acceptability, appropriateness and/or feasibility of the implementation effort Decrease costs of the implementation effort	Implementer level (CSU) Organizational level (DPO) Clinician level (AC)	N/A	Pre-implementation/planning/pilot phase	Planned/proactive	Implementer or implementation strategy expert (ST / Project team)	Implementation/facilitation team (ST)	Yes	Incorporated into CTM Phase 4 model
0	Structure of AC training modules • Self-directed & interactive modules, 1-hr Q&A • Evaluation module for ACs with large DPOs only • ACs delivering virtual programs received separate training for virtual delivery	• Additional promotion and recruitment materials needed • Some training material only relevant to select group of ACs (those with fitness background)	Adapted structure of training modules: • CTM Overview module (previously part of self-directed) • CTM Delivery module (previously self-directed) • Facilitation Skills module (previously interactive) • Virtual delivery module • PA and behaviour change basics module • PA and chronic conditions module • Promotion and recruitment module • Evaluation module for all 'usual practice' programs (large and…		IS	Training and/or evaluation	N/A	• Adding elements • Reordering of implementation modules or segments	Fidelity consistent	Increase acceptability, appropriateness and/or feasibility of the implementation effort	Organizational level (DPO) Clinician level (AC)	N/A	Pre-implementation/planning/pilot phase	Planned/proactive	Implementer or implementation strategy expert (ST / Project team)	Implementation/facilitation team (ST) Network system/community (all ACs)	Yes	Incorporated into CTM Phase 4 model
0	Interactive module of AC training included scenario discussion only	ACs felt they were provided limited background on motivational interviewing and facilitation.	Added 'Facilitation Skills' module – includes more detail on motivational interviewing techniques and facilitation skills along with scenario discussions. Some of the motivational interviewing/facilitation skills were included in the ‘supplemental resources’ previously.		IS	Training and/or evaluation	N/A	Adding elements	Fidelity consistent	Increase acceptability, appropriateness and/or feasibility of the implementation effort	Clinician level (AC)	N/A	Pre-implementation/planning/pilot phase	Planned/proactive	Implementer or implementation strategy expert (ST / Project team)	Network system/community (all ACs)	Yes	Incorporated into CTM Phase 4 model
0	8 GMs, pre-defined topics • GM 1: Welcome & goal setting • GM 2: Physical activity • GM 3: Incidental physical activity • GM 4: Goal setting revisited • GM 5: Nutrition • GM 6: Falls prevention • GM 7: Stress management and brain health • GM 8: Revisit goals and celebrate	ACs felt there was limited flexibility in group meeting topics.	8 GMs: 4 mandatory meeting topics + 4 standard meetings that can be traded with alternate meeting topics (22) as chosen by ACs/participants Mandatory GMs: • GM 1: Welcome & goal setting • GM 2: Physical activity • GM 3: Incidental physical activity • GM 8: Revisit goals & celebrate Standard GMs: • GM 4: Building your support team • GM 5: Nutrition • GM 6: Falls prevention • GM 7: Stress management		Both	Content	N/A	Adding elements Loosening structure Reordering of intervention modules or segments	Fidelity consistent	Increase reach of the EBI Increase adoption of the EBI Increase acceptability, appropriateness and/or feasibility of the implementation effort Improve fit with recipients	Clinician level (AC) Target intervention group / Participant level (OA)	N/A	Pre-implementation/planning/pilot phase	Planned/proactive	Implementer or implementation strategy expert (ST / Project team)	Network system/community (all ACs) Group of participants or other recipients for whom the EBI is being implemented	Yes	Incorporated into CTM Phase 4 model
0	GM 4 topic: Goal Setting Revisited	ACs felt there was insufficient time between the one-on-one consultations (where participants set their goals) and GM 4 to allow for reflection.	GM 4 topic changed to: Building Your Support Team; revisiting goals moved to GM 8		EBI	Content	N/A	Substituting	Fidelity consistent	Improve fit with participants	Target intervention group (OA)	N/A	Pre-implementation/planning/pilot phase	Planned/proactive	Implementer or implementation strategy expert (ST / Project team)	N/A	Yes	Incorporated into CTM Phase 4 model
0	GM 6 topic: Falls Prevention	ACs felt that GM 6 was too lecture-based and did not allow enough time for group / paired discussion.	GM 6 Falls Prevention • removed some descriptive content around risk factors (biological, behavioural, environmental) • added information on how to get up from a fall or get help if you can’t get up.		IS	Content	N/A	Tailoring/tweaking/refining	Fidelity consistent	Increase acceptability, appropriateness and/or feasibility of the implementation effort	Participant level (OA)	N/A	Pre-implementation/planning/pilot phase	Planned/proactive	Implementer or implementation strategy expert (ST / Project team)	Network system/community (all ACs) Group of participants or other recipients for whom the EBI is being implemented	Yes	Incorporated into CTM Phase 4 model
0	GM 7 topic: Stress Management and Brain Health	ACs reported that there was too much content to cover in this meeting.	GM 7 (Standard): Stress Management • removed brain health content • Added optional meeting topic for ACs/participants interested in brain health (Keeping the Aging Mind Sharp)		IS	Content	N/A	Removing/skipping elements	Fidelity consistent	Increase acceptability, appropriateness and/or feasibility of the implementation effort	Participant level (OA)	N/A	Pre-implementation/planning/pilot phase	Planned/proactive	Implementer or implementation strategy expert (ST / Project team)	Network system/community (all ACs) Group of participants or other recipients for whom the EBI is being implemented	Yes	Incorporated into CTM Phase 4 model
0	My Choose to Move Action Plans: 3 versions, 1 for GM1, GM 4 and GM 8	Too many documents for ACs to print.	My CTM Action Plans • 2 versions, 1 for GM1 and GM 8 • PA logs included as part of action plans		IS	Content	N/A	Removing/skipping elements	Fidelity consistent	Increase acceptability, appropriateness and/or feasibility of the implementation effort	Clinician level (AC) Participant level (OA)	N/A	Pre-implementation/planning/pilot phase	Planned/proactive	Implementer or implementation strategy expert (ST / Project team)	Individual clinician or teacher charged with implementing the EBI (AC)	Yes	Incorporated into CTM Phase 4 model
0	Separate sets of group meeting slides for in-person and virtual group meetings	High administrative burden for ACs and CSU	Combined in-person and virtual group meeting slides		IS	Content	N/A	Changes in packaging or materials	Fidelity consistent	Increase acceptability, appropriateness and/or feasibility of the implementation effort	Implementer level (CSU) Clinician level (AC)	N/A	Pre-implementation/planning/pilot phase	Planned/proactive	Implementer or implementation strategy expert (ST / Project team)	Network system/community (all ACs) Implementation/facilitation team (ST)	Yes	Incorporated into CTM Phase 4 model
0	Recommended movement breaks and ice-breaker activities included in each GM (with guidance that ACs could choose different activities if desired)	Limited options for movement break and icebreaker activities for ACs who may be less experienced or feel that the suggested activities in each GM don’t align well with their groups.	Addition of movement break and icebreaker menus for ACs to choose from if they want more ideas.		EBI	Content	N/A	Adding elements	Fidelity consistent	Improve feasibility	Clinician level (AC)	N/A	Pre-implementation/planning/pilot phase	Planned/proactive	Implementer or implementation strategy expert (ST / Project team)	N/A	Yes	Incorporated into CTM Phase 4 model
0	Activity Inventory for small DPOs only	Large DPO ACs relied heavily on other activity offerings within the rec centre setting instead of looking for opportunities elsewhere in the community, and there was more focus on physical vs social activities.	Activity Inventory for all DPOs		IS	Content	N/A	Adding elements	Fidelity consistent	Increase reach of the EBI	Clinician level (AC) Participant level (OA)	N/A	Pre-implementation/planning/pilot phase	Planned/proactive	Implementer or implementation strategy expert (ST / Project team)	Network system/community (all ACs) Organization	Yes	Incorporated into CTM Phase 4 model
0	Only physical activity highlighted in My Action Plans	My Action Plan did not highlight social activities.	Physical and social activities highlighted in My Action Plans		EBI	Content	N/A	Adding elements	Fidelity consistent	Increase reach or engagement	Individual practitioner (AC) Target intervention group (OA)	N/A	Pre-implementation/planning/pilot phase	Planned/proactive	Implementer or implementation strategy expert (ST / Project team)	N/A	Yes	Incorporated into CTM Phase 4 model
0	Promotion and recruitment resources available from ‘Recruitment and Referral’ page on https://choosetomove.ca (password protected)	CTM promotion and recruitment materials not easily accessible on the CTM website.	Promotion and recruitment resources available within ‘Promotion and Recruitment’ module on https://choosetomove.ca. Users will have individual login credentials.		IS	Context	Format	Changes in packaging or materials	Fidelity consistent	Increase acceptability, appropriateness and/or feasibility of the implementation effort	Organizational level (DPO)	N/A	Pre-implementation/planning/pilot phase	Planned/proactive	Implementer or implementation strategy expert (ST / Project team)	Network system/community (all ACs) Organization	Yes	Incorporated into CTM Phase 4 model
0	Large DPOs run own Facebook ad campaigns (and are funded by AAS to do so)	Not cost efficient for CTM ad campaigns to be run by various DPOs	AAS coordinates Facebook ad campaigns for all DPOs		IS	Context	Format	Changes in packaging or materials	Fidelity consistent	Decrease costs of the implementation effort Increase reach of the EBI	Organizational level (DPO)	N/A	Pre-implementation/planning/pilot phase	Planned/proactive	Implementer or implementation strategy expert (ST / Project team)	Organization Implementation/facilitation team (ST)	Yes	Incorporated into CTM Phase 4 model
0	Telephone Screening tool for small DPOs; Information document for frontline staff at large DPOs	Separate documents for large and small DPOs creates admin burden for CSU.	• Original Telephone Screening tool separated into two documents: Screening tool + Provincial resources • Info for Frontline Staff document replaced with screening tool. • Documents shared with all DPOs		IS	Context	Format	Changes in packaging or materials	Fidelity consistent	Increase acceptability, appropriateness and/or feasibility of the implementation effort	Organizational level (DPO) Implementer level (CSU)	N/A	Pre-implementation/planning/pilot phase	Planned/proactive	Implementer or implementation strategy expert (ST / Project team)	Organization Implementation/facilitation team (ST)	Yes	Incorporated into CTM Phase 4 model
0	N/A	No email template for initial contact for virtual delivery of CTM.	Virtual Delivery Initial Contact email template created.		IS	Content	N/A	Adding elements	Fidelity consistent	Increase acceptability, appropriateness and/or feasibility of the implementation effort Increase reach of the EBI	Organizational level (DPO)	N/A	Pre-implementation/planning/pilot phase	Planned/proactive	Implementer or implementation strategy expert (ST / Project team)	Organization Network system/community (all ACs)	Yes	Incorporated into CTM Phase 4 model
0	Regular check-in calls (2-3x/program) for small DPOs with CSU to gather information on CTM adaptations.	High administrative burden on CSU.	• Collect data on adaptations for ‘usual practice’ programs through AC 3-month program feedback survey. • Check-in calls as needed for small DPOs, no pre-scheduled calls.		IS	Context	Format	Removing/skipping elements Tailoring/tweaking/refining	Fidelity consistent	Decrease costs of the implementation effort	Implementer level (ST)	N/A	Pre-implementation/planning/pilot phase	Planned/proactive	Implementer or implementation strategy expert (ST / Project team)	Organization Implementation/facilitation team (ST)	Yes	Incorporated into CTM Phase 4 model
0	Organizations request funds as needed to cover participant transportation costs and/or refreshments for group meetings	Transportation and refreshment funds not provided to all organizations, and some organizations were pulling funds from other areas of the budget to cover these costs	If requested, small partner organizations provided $100 for transportation and $100 for refreshments		IS	Content	Other	Tailoring/tweaking/refining	Fidelity consistent	Increase acceptability, appropriateness and/or feasibility of the implementation effort	Organizational level (DPO) Clinician level (AC)	N/A	Pre-implementation/planning/pilot phase	Planned/proactive	Program leader, manager or administrator (AAS)	Organization Network system/community (all ACs)	Yes	Incorporated into CTM Phase 4 model
0	Large DPOs host own Community of Practice calls for ACs; AAS hosts quarterly COP calls for ACs at small DPOs	• High administrative burden on CSU • More opportunities needed for AC collaboration and engagement across organizations, regardless of size.	• AAS hosts COP calls for all ACs: 3 calls per cycle for a total of 9 COP calls/year: Winter (Promotion and Recruitment), Spring (Tips & Tricks for Program Delivey), Fall (Skill Building)		IS	Context	Format	Tailoring/tweaking/refining	Fidelity consistent	Increase acceptability, appropriateness and/or feasibility of the implementation effort	Implementer level (ST)	N/A	Pre-implementation/planning/pilot phase	Planned/proactive	Implementer or implementation strategy expert (ST / Project team)	Network system/community (all ACs) Implementation/facilitation team (ST)	Yes	Incorporated into CTM Phase 4 model
0	Participant evaluation includes health-related quality of life (EQ-5D-5L), mobility (MAT-sf), sitting time, and questions related to social network and friend encouragement related to physical activity.	• The research team suggested streamlining the evaluation to include only one measure of mobility (i.e., remove MAT-sf, leave in questions about mobility limitations) and remove the EQ-5D-5L, as the economic evaluation was complete. • Additional review of the participant evaluation highlighted the need to include questions related to disability, living arrangement and marital status.	• Removed EQ-5D-5L, MAT-sf, and questions related to sitting time, social network and friend encouragement from the participant evaluation. • Added questions related to disability status, current living arrangement and marital status.		EBI	Training and/or evaluation	N/A	Removing/skipping elements Adding elements Shortening/condensing	Fidelity consistent	Increase retention	Target intervention group (OA)	Recipient (OA) (e.g., Race/ethnicity, cultural norms, literacy)	Pre-implementation/planning/pilot phase	Planned/proactive	Intervention developer/purveyor (CSU) Researcher	N/A	Yes	Incorporated into CTM Phase 4 model
Adaptations to the updated CTM Phase 4 model for Punjabi-speaking older adults
1-2	Target population: Adults aged 55 years and older, men and women	CTM did not reach ethnocultural groups including Punjabi-speaking older adults, who are the 2nd largest visible minority in Metro Vancouver.	Target population: South Asian Punjabi-speaking women and men aged 55 years and older		EBI	Context	Population	Tailoring/tweaking/refining	Fidelity consistent	Increase health equity or decrease disparities in EBI delivery	Cohort/individuals that share a particular characteristic (OA)	Recipient (OA) (e.g., Race/ethnicity, cultural norms, literacy)	Pre-implementation/planning/pilot phase	Planned/proactive	Program leader, manager or administrator (AAS)	N/A	Yes	Incorporated into prototype CTM model for Punjabi-speaking OAs
1-2	N/A	For older South Asian women with time-sensitive responsibilities, the best program timings are in the morning, depending on proximity to their homes. Later in the afternoon/evening can be harder for grandparents who look after their grandkids.	Timing of program delivery (determined by organization) needs to be considered to align with familial responsibilities		EBI	Context	Format	Tailoring/tweaking/refining	Fidelity consistent	Improve fit with participants Address cultural factors	Cohort/individuals that share a particular characteristic (OA)	Recipient (OA) (e.g., Race/ethnicity, cultural norms, literacy)	Pre-implementation/planning/pilot phase	Planned/proactive	Clinician(s) or teacher(s) who are being asked to use the EBI (AC)	N/A	Yes	Incorporated into prototype CTM model for Punjabi-speaking OAs
1-2	Screening tool: 1. Do you consider yourself an older adult? 2. Do you consider yourself to be inactive (<150 min/week of MVPA) 3. Are you interested in becoming more physically active? 4. Are you able to commit to a 3-month program?	Screening tool needs to be simplifed based on feedback from one DPO Literacy and education; motivation and readiness The more questions participants are asked, it may discourage them to want to take part in the program. Family support may be needed to answer more in-depth questions.	Simplified screening tool for Punjabi-speaking older adults: 1. Are you 55 years or older? 2. Are you interested in becoming more physically active? 3. Are you able to commit to a 3-month program? Screening tool translated to Punjabi and phonetic Punjabi; part of Intake Form		EBI	Content	N/A	Tailoring/tweaking/refining	Fidelity consistent	Increase health equity or decrease disparities in EBI delivery Increase acceptability, appropriateness and/or feasibility of the implementation effort	Cohort/individuals that share a particular characteristic (OA)	Recipient (OA) (e.g., Race/ethnicity, cultural norms, literacy)	Pre-implementation/planning/pilot phase	Planned/proactive	Implementer or implementation strategy expert (ST / Project team)	N/A	Yes	Incorporated into prototype CTM model for Punjabi-speaking OAs
1-2	Generic CTM posters and rack cards	Promotional materials were not tailored to Punjabi-speaking population	• Update CTM posters and rack cards to include images of older adults having fun (dancing, signing, smiling - remove photos of older adults gardening). Include images that are representative of the aging population (i.e., inclusive photos that are not ableist). Remove language around independence • Communications team supported with capturing images of current cohorts (real photos of real partici…		IS	Content	N/A	Tailoring/tweaking/refining	Fidelity consistent	Increase health equity or decrease disparities in EBI delivery	Participant level (OA)	Recipient (OA) (e.g., Race/ethnicity, cultural norms, literacy)	Pre-implementation/planning/pilot phase	Planned/proactive	Implementer or implementation strategy expert (ST / Project team)	Participants or other recipients that share a particular characteristic	Yes	Incorporated into prototype CTM model for Punjabi-speaking OAs
1-2	Activity coach training - online only	DPOs preferred in-person interactions. ACs also requested in-person interactions when discussing program details/training debrief.	• AC training hosted in hybrid format (virtual and in-person) • Supplemented AC online training with in-person or virtual Q&A session • Provided 4 DPOs the option of having an in-person or virtual Q&A		IS	Training and/or evaluation	N/A	Tailoring/tweaking/refining	Fidelity consistent	Increase acceptability, appropriateness and/or feasibility of the implementation effort	Implementer level (AC) Organization level (DPO)	Provider/Activity Coach (e.g., Cultural norms, Race/Ethnicity, first/spoken languages)	Pre-implementation/planning/pilot phase	Planned/proactive	Implementer or implementation strategy expert (ST / Project team)	Network system/community (all ACs)	Yes	Incorporated into prototype CTM model for Punjabi-speaking OAs
1-2	Generic activity coach training module	AC training modules needed for adapted Punjabi-program	Additional training modules added: 1. CTM Delivery-Punjabi 2. CTM Evaluation-Punjabi These modules replaced the CTM Phase 4 delivery and evaluation modules		IS	Training and/or evaluation	N/A	Substituting	Fidelity consistent	Increase acceptability, appropriateness and/or feasibility of the implementation effort Increase health equity or decrease disparities in EBI delivery	Clinician level (AC)	Provider/Activity Coach (e.g., Cultural norms, Race/Ethnicity, first/spoken languages)	Pre-implementation/planning/pilot phase	Planned/proactive	Implementer or implementation strategy expert (ST / Project team)	Network system/community (all ACs)	Yes	Incorporated into prototype CTM model for Punjabi-speaking OAs
1-2	30-minute one-on-one consultation	Participants were not able to complete goal setting forms on their own and required support from the AC (literacy concerns)	60-minute one-on-one consultation • the consultation became another point of contact between AC and participants • AC reviewed action plan with participants at this meeting		EBI	Content	N/A	Lengthening/extending	Fidelity consistent	To address cultural factors Improve feasibility	Cohort/individuals that share a particular characteristic (OA)	Recipient (OA) (e.g., Race/ethnicity, cultural norms, literacy)	Pre-implementation/planning/pilot phase	Planned/proactive	Implementer or implementation strategy expert (ST / Project team)	N/A	Yes	Incorporated into prototype CTM model for Punjabi-speaking OAs
1-2	Group meetings are 60 min each	• Longer sessions are more appealing to this population due to transportation issues (e.g., taking the bus, or being dropped off). • Increase time for development of trust and relationships. • Need more time to pause and build.	Increase GM length to 90 minutes • Check-in/Group agreement: 10 min • Welcome activity: 10-15 min • GM topic education & group discussions: 45 min • Movement break: 20-30 min		EBI	Content	N/A	Lengthening/extending	Fidelity consistent	To address cultural factors Improve feasibility	Cohort/individuals that share a particular characteristic (OA)	Recipient: Cultural norms	Pre-implementation/planning/pilot phase	Planned/proactive	Implementer or implementation strategy expert (ST / Project team)	N/A		Incorporated into prototype CTM model for Punjabi-speaking OAs
1-2	Movement Break: 5-10 min in total; 1 to 2 movement breaks depending on the GM topic and left to AC’s discretion on length of movement break	No time for requested movement break (needed to increase engagement and willingness to participate) in 60 min meeting	• Movement break: 20-30 min; Facilitated in two separate breaks for the group meetings (one more of an “exercise” feel and the other more so a movement activity with props or a game with an aim)		EBI	Context	Format	Tailoring/tweaking/refining Lengthening Adding elements	Fidelity consistent	Increase reach or engagement To address cultural factors	Cohort/individuals that share a particular characteristic (OA)	Recipient: Motivation and readiness; Cultural norms	Pre-implementation/planning/pilot phase	Planned/proactive	Implementer or implementation strategy expert (ST / Project team) Clinician(s) or teacher(s) who are being asked to use the EBI (AC)	N/A	Yes	Incorporated into prototype CTM model for Punjabi-speaking OAs
1-2	8 group meetings: 4 mandatory + 4 standard meetings that can be traded with alternate meeting topics as desired by coaches/ participants	• During interviews and focus groups, consistent feedback pointed to Falls Prevention, Nutrition and Self-Care as important topics for this population. • Examples and descriptions for group meeting topics need to be culturally relevant. Mental health should be a mandatory topic, where awareness and support services are highlighted. The topic of mental health and accessing resources is beginning t…	8 GMs with set standard topics; alternate meeting options to be expanded in future GM 1: Welcome and goal setting with an intro to physical activity GM 2: Physical activity GM 3: Incidental physical activity GM 4: Healthy Connections GM 5: Falls Prevention GM 6: Nutrition GM 7: Self care GM 8: Goals & celebration		IS	Content	N/A	Tailoring/tweaking/refining	Fidelity consistent	Increase acceptability, appropriateness and/or feasibility of the implementation effort Increase health equity or decrease disparities in EBI delivery	Participant level (OA)	Recipient: Cultural norms Recipient: Comorbidity/Multimorbidity Recipient: Emergent circumstance	Pre-implementation/planning/pilot phase	Planned/proactive	Implementer or implementation strategy expert (ST / Project team) Clinician(s) or teacher(s) who are being asked to use the EBI (AC)	Participants or other recipients that share a particular characteristic	Yes	Incorporated into prototype CTM model for Punjabi-speaking OAs
1-2	Peer check-ins introduced at GM2 - ACs encourage participants to pair up with a buddy in the group with whom they can connect with outside of GMs and receive motivation to be active and to progress with their goals.	"Peer check-in" language not culturally relevant in Punjabi	• Peer check-in changed to CTM Dost ("friend") • As in standard Phase 4, ACs encourage participants to check in with their Dost outside of GMs		EBI	Content	N/A	Tailoring/tweaking/refining	Fidelity consistent	Increase reach or engagement To address cultural factors	Cohort/individuals that share a particular characteristic (OA)	Recipient: Cultural norms	Pre-implementation/planning/pilot phase	Planned/proactive	Implementer or implementation strategy expert (ST / Project team)	N/A	Yes	Incorporated into prototype CTM model for Punjabi-speaking OAs
1-2	Paperwork at GM1: • Tell Me About Yourself • Action plan - start at GM1, do at home and then bring to one on one consultation	DPOs and ACs felt there was too much paperwork. Tell Me About Yourself form: When completing the form on their own, participants tend to focus on the pain section and not complete the rest of the form. The concept of goals and SMART goals are not relevant in Punjabi. Limited experience/accessibility with online resources may impact both completion of the Action Plan and data collection.	• Translated forms into Punjabi • Revised/modified these materials for AC to use as guidelines during the 1:1 meeting instead of the participants completing the forms on their own • The AC completed these to help with program planning and understanding of their participants • Participants were given the option to complete the new modified Action Plan with the AC’s assistance		EBI	Content Context	Format	Integrating parts of the implementation strategy into another strategy	Fidelity consistent	Improve fit with participants	Organizational level (DPO) Clinician level (AC)	Recipient: Cultural norms Recipient: Literacy and education level	Pre-implementation/planning/pilot phase	Planned/proactive	Implementer or implementation strategy expert (ST / Project team)	N/A	Yes	Incorporated into prototype CTM model for Punjabi-speaking OAs
1-2	Font size of # used on all participant-facing CTM documents	Larger font size required for Punjabi population to address the tension between age-related sensory changes (e.g., requiring larger font for vision) and accommodating language needs (e.g., space constraints for lengthy Punjabi text).	Participant-facing materials use a simplified layout; this includes a large, accessible font, integrating pictorial aids and icons to reduce text volume, and employing a format to neatly present English, Punjabi (Gurmukhi), and phonetic translations without compromising readability.		IS	Content	N/A	Tailoring/tweaking/refining	Fidelity consistent	Increase health equity or decrease disparities in EBI delivery	Participant level (OA)	N/A	Pre-implementation/planning/pilot phase	Planned/proactive	Implementer or implementation strategy expert (ST / Project team)	Participants or other recipients that share a particular characteristic	Yes	Incorporated into prototype CTM model for Punjabi-speaking OAs
1-2	Paperwork at GM1: • Get Active questionnaire	Translation required Considering literacy levels it may not be possible for participants to complete on their own.	• Translated into Punjabi • Participants complete the questionnaire in group setting during the Information Session • AC reviewed the questionnaire prior/during the 1:1 meeting		EBI	Content	N/A	Tailoring/tweaking/refining	Fidelity consistent	Improve fit with participants To address cultural factors	Cohort/individuals that share a particular characteristic (OA)	Recipient: Cultural norms Recipient: Literacy and education level	Pre-implementation/planning/pilot phase	Planned/proactive	Implementer or implementation strategy expert (ST / Project team)	N/A	Yes	Incorporated into prototype CTM model for Punjabi-speaking OAs
1-2	GM summaries - 2 page PDF summary of content for each GM	Considering literacy levels of participants, the summaries would be too much paperwork	• Removed GM summaries • Considered translation of GM summaries for future programs		IS	Content	N/A	Removing/skipping elements	Unknown	Increase acceptability, appropriateness and/or feasibility of the implementation effort Increase health equity or decrease disparities in EBI delivery	Participant level (OA)	N/A	Pre-implementation/planning/pilot phase	Planned/proactive	Implementer or implementation strategy expert (ST / Project team)	Participants or other recipients that share a particular characteristic	Yes	Incorporated into prototype CTM model for Punjabi-speaking OAs
1-2	Movement Break / Ice Breaker activity menu for ACs	• Translation of "ice breaker" not suited for Punjabi-speaking population • Menu did not include culturally appropriate activities • Need activities that are relevant and familiar to South Asian women, and also teach them newer and relevant activities that they can then practice or engage in with their grandchildren	• Created a movement break and welcome activity menu with culturally relevant and culturally appropriate materials such as videos, and printed materials. • Included YouTube videos with diverse instructors leading movement/ exercises (finding existing materials and looking into creating own materials) • Incorporated videos with S Asian instructors • Included some of the Indian dance videos that ar…		EBI	Content	N/A	Tailoring/tweaking/refining Adding elements	Fidelity consistent	Improve fit with participants To address cultural factors	Cohort/individuals that share a particular characteristic (OA)	Recipient: Cultural norms Recipient: Literacy and education level	Pre-implementation/planning/pilot phase	Planned/proactive	Implementer or implementation strategy expert (ST / Project team)	N/A	Yes	Incorporated into prototype CTM model for Punjabi-speaking OAs
1-2	Group challenges provided to participants at end of each GM	Translation of "group challenges" not suited for Punjabi	Replaced "Group challenges" with "Next steps", which translated better to Punjabi and was considered a softer approach. ACs reviewed what was covered in the GM and asked participants to work on incorporate learnings into their daily activities - more an individual approach instead of a group challenge		EBI	Content	N/A	Substituting	Fidelity consistent	Improve fit with participants To address cultural factors	Cohort/individuals that share a particular characteristic (OA)	Recipient: Cultural norms Recipient: Literacy and education level	Pre-implementation/planning/pilot phase	Planned/proactive	Implementer or implementation strategy expert (ST / Project team)	N/A	Yes	Incorporated into prototype CTM model for Punjabi-speaking OAs
1-2	GM slides in English - prescriptive for group and paired discussions; contact information formally included in each CTM participant group	Consistent feedback received from ACs and organizations, as well as feedback from project team on adding culturally relevant examples, reducing/simplifying text and adding imagery from everyone involved in the adapted model.	• Reduced text • Simplified language and added phonetics • Added imagery which will help participants understand the slides and reduced the text on the slides • Added culturally relevant examples and discussion questions • Added Punjabi translation on the slides for keywords and themes (but some English retained) • Initially added imagery and certain movement breaks better suited and appropriate …		EBI	Content	N/A	Tailoring/tweaking/refining	Fidelity consistent	Improve fit with participants To address cultural factors	Cohort/individuals that share a particular characteristic (OA)	Recipient: Cultural norms Recipient: Literacy and education level	Pre-implementation/planning/pilot phase	Planned/proactive	Implementer or implementation strategy expert (ST / Project team)	N/A	Yes	Incorporated into prototype CTM model for Punjabi-speaking OAs
1-2	GM 1: Welcome & Goal Setting (required meeting topic)	SMART goals needed to be simplified/translated The concept of goal setting is unfamiliar and a newer concept. There needs to be more firm guidance in goal setting from the AC Individual goal setting is good, but providing more time or opportunity within the CTM will help strengthen the understanding of the concept of goals and goal setting.	• Highlighted/defined and translated CTM principles • Physical Activity Log modified and used as a paper-based tool for goal setting (in support or in place of SMART goals) • 1 Action Plan created instead of the standard 2 action plans • Action plans introduced in GM1 and completed during 1:1 meeting		EBI	Content	N/A	Substituting	Fidelity consistent	Improve fit with participants	Cohort/individuals that share a particular characteristic (OA)	Recipient: Cultural norms Recipient: Literacy and education level	Pre-implementation/planning/pilot phase	Planned/proactive	Implementer or implementation strategy expert (ST / Project team)	N/A	Yes	Incorporated into prototype CTM model for Punjabi-speaking OAs
1-2	GM 2: Build Your Support Team (GM 4)	Observation of GM 4 at DPO that delivered CTM in Punjabi before the adaptation: the AC changed the standard topic to “Healthy Communication”, which was a better fit for this popuation. The HB was inspired by this to creating the “healthy connections” topic	• GM title changed from "Build your Support Team" to "Building Healthy Connections" • Highlighted/educated on healthy boundaries, positive connections and effective communication • Healthy friendships/ connections will help this population in building their social support team and their social connectedness • Empathy to be discussed and explained		EBI	Content	N/A	Adding elements Tailoring/tweaking/refining Changes in materials or packaging	Fidelity consistent	Improve fit with participants To address cultural factors	Cohort/individuals that share a particular characteristic (OA)	Recipient: Cultural norms Recipient: Literacy and education level	Pre-implementation/planning/pilot phase	Planned/proactive	Implementer or implementation strategy expert (ST / Project team)	N/A	Yes	Incorporated into prototype CTM model for Punjabi-speaking OAs
1-2	GM 5: Falls prevention	Need to include actionable items so AC can repeat information to participants	• Added imagery to reduce text and help with comprehension • Removed “Assessing your home for hazards” • Focused on ways to prevent falls and how to get up if you have fallen		EBI	Content	N/A	Adding elements Tailoring/tweaking/refining Changes in materials or packaging Skipping elements	Fidelity consistent	Improve fit with participants To address cultural factors	Cohort/individuals that share a particular characteristic (OA)	Recipient: Cultural norms Recipient: Literacy and education level	Pre-implementation/planning/pilot phase	Planned/proactive	Implementer or implementation strategy expert (ST / Project team)	N/A	Yes	Incorporated into prototype CTM model for Punjabi-speaking OAs
1-2	GM 6: Nutrition	Needs to be culturally relevant (i.e., examples of vegetarian options that are culturally relevant)	• Focused on well-balanced diet and nourishing our bodies with some major nutrients/minerals • Healthy weight management slide reinforced the message of everyone’s bodies and needs being different. Also addressed “losing weight/weight loss” is not the same as nutrition and nourishing your body • Looked for alternative but recognized resource from Canada’s Food Guide • Culturally relevant examples…		EBI	Content	N/A	Adding elements Tailoring/tweaking/refining Changes in materials or packaging Skipping elements	Fidelity consistent	Improve fit with participants To address cultural factors	Cohort/individuals that share a particular characteristic (OA)	Recipient: Cultural norms Recipient: Literacy and education level	Pre-implementation/planning/pilot phase	Planned/proactive	Implementer or implementation strategy expert (ST / Project team)	N/A	Yes	Incorporated into prototype CTM model for Punjabi-speaking OAs
1-2	Invitation letter and consent forms	Language too technical and not culturally relevant	• Translated into Punjabi • Provided participants with option of receiving forms in English or Punjabi		EBI	Training and/or evaluation	N/A	Tailoring/tweaking/refining	Fidelity consistent	Improve fit with participants To address cultural factors	Cohort/individuals that share a particular characteristic (OA)	Recipient: First / spoken languages Recipient: Literacy and education level Recipient: Motivation and readiness	Pre-implementation/planning/pilot phase	Planned/proactive	Implementer or implementation strategy expert (ST / Project team)	N/A	Yes	Incorporated into prototype CTM model for Punjabi-speaking OAs
1-2	Data collection occurred after GM1 (online or paper-based questionnaires; most participants complete on their own)	Participants required additional support to complete the questionnaires but there was insufficient time to complete all forms at GM 1	• Data collection to take place in 4 parts for participant questionnaire 1. Intake form 2. GM 1 3. One-on-one meeting 4. GM 8 • Intake forms made available in English, Punjabi and Phonetic Punjabi. Participants complete paper based form or the AC administers the online version. • GM 1 questionnaire is paper-based and is administered by the CSU in person (in Punjabi or English) • 1:1 Meeting quest…		EBI	Training and/or evaluation	N/A	Tailoring/tweaking/refining	Fidelity consistent	Improve fit with participants To address cultural factors	Cohort/individuals that share a particular characteristic (OA)	Recipient: First / spoken languages Recipient: Literacy and education level	Pre-implementation/planning/pilot phase	Planned/proactive	Implementer or implementation strategy expert (ST / Project team)	N/A	Yes	Incorporated into prototype CTM model for Punjabi-speaking OAs
1-2	Older adult questionnaire (addresses physical activity, loneliness, social isolation, mobility etc.)	• Language too technical, many terms aren't culturally relevant/sensitive and some outcomes (e.g., BMI) are Eurocentric. • Questionnaire too long to complete in the provided time. • Online completion of questionnaires via REDCap not feasible.	• Survey divided into 3 parts to decrease load on participants and have AC and/or CSU support questionnaire completion. Data collection is spread across intake form, GM 1, one-on-one meeting • Simplified language of existing evaluation questions (matching the English ESL survey) • Added images/icons (smiley faces, pictures) to help with responses for certain questions • Removed items from questio…		EBI	Training and/or evaluation	N/A	Tailoring/tweaking/refining	Fidelity consistent	Improve fit with participants To address cultural factors	Cohort/individuals that share a particular characteristic (OA)	Recipient: First / spoken languages Recipient: Literacy and education level Recipient: Motivation and readiness	Pre-implementation/planning/pilot phase	Planned/proactive	Implementer or implementation strategy expert (ST / Project team)	N/A	Yes	Incorporated into prototype CTM model for Punjabi-speaking OAs
1-2	Older adult program feedback questionnaire	Language too technical and many terms aren't culturally relevant.	• Added stars below text responses to help participants respond to program satisfaction question • Translated into Punjabi • Paper-based instead of online		EBI	Training and/or evaluation	N/A	Tailoring/tweaking/refining	Fidelity consistent	Improve fit with participants To address cultural factors	Cohort/individuals that share a particular characteristic (OA)	Recipient: First / spoken languages Recipient: Literacy and education level Recipient: Motivation and readiness	Pre-implementation/planning/pilot phase	Planned/proactive	Implementer or implementation strategy expert (ST / Project team)	N/A	Yes	Incorporated into prototype CTM model for Punjabi-speaking OAs
1-2	Check-in call as needed for small DPOs, no pre-scheduled calls.	Implementation support required for new organizations especially for first program (info session / GM1)	• Regular check-in calls or meetings for DPOs • Check-ins after site visits (during Information Session, GM 1 and GM 8) • Check-ins when picking up paper-based questionnaires		IS	Context	Format	Adding elements	Fidelity consistent	Increase acceptability, appropriateness and/or feasibility of the implementation effort	Organization level (DPO) Clinician level (AC)	N/A	Pre-implementation/planning/pilot phase	Unplanned/reactive	Implementer or implementation strategy expert (ST / Project team)	Organization	Yes	Incorporated into prototype CTM model for Punjabi-speaking OAs
1-2	DPOs hire ACs who have experience in fitness leadership or in working with older adults.	• Organizations should hire ACs who are members of the Punjabi community. • Trust building is key to engaging older adults in the community. • The facilitator should know how to connect with the participants. How to greet them, for example in Punjabi culture the greetings are more formal and addressing men as uncle and women as aunties and folding your hands together is seen as respectful.	AC should be a Champion - a member of the community or established relationships with the community		IS	Context	Personnel	Tailoring/tweaking/refining	Fidelity consistent	Increase reach of the EBI	Clinician level (AC) Participant level (OA)	N/A	Pre-implementation/planning/pilot phase	Planned/proactive	Implementer or implementation strategy expert (ST / Project team)	Organization Network system/community (all ACs)	Yes	Incorporated into prototype CTM model for Punjabi-speaking OAs
3	Recruitment strategies for organizations focus on referral partners, past participats, social media/traditional media	Balancing the role of family involvement with the program's focus on individual autonomy - in Punjabi communities, which are collectivist, health decisions often involve family members; involvement of family is key in engaging collectivst societies like Punjabi communities.	Organizations are encouraged to involve family members (children or siblings) of older adults in the recruitment process (i.e., family members tell older adults about CTM and encourage them to join)		IS	Context	Format	Tailoring/tweaking/refining	Fidelity consistent	Increase health equity or decrease disparities in EBI delivery	Participant level (OA)	N/A	Pre-implementation/planning/pilot phase	Planned/proactive	Implementer or implementation strategy expert (ST / Project team)	Organization Patients or other recipients that share a particular characteristic	Yes	Incorporated into prototype CTM model for Punjabi-speaking OAs
3	N/A	Important that adaptations to the CTM model navigate the diverse and sometimes specific cultural and religious practices within the broader South Asian community to ensure adaptations are resonant and inclusive	• Encouraged organizations to intentionally schedule sessions around important holidays and cultural events • GMs incorporated traditional chai-sharing rituals to foster community • Organizations and ACs encouraged to be mindful of current sociopolitical contexts affecting participants' lives (eg., Khalistan partition movement) and how these contexts may influence GMs		IS	Context	Format	Tailoring/tweaking/refining	Fidelity consistent	Increase health equity or decrease disparities in EBI delivery	Participant level (OA)	N/A	Pre-implementation/planning/pilot phase	Planned/proactive	Implementer or implementation strategy expert (ST / Project team)	Organization Network system/community (all ACs) Patients or other recipients that share a particular characteristic	Yes	Incorporated into prototype CTM model for Punjabi-speaking OAs
3	At information sessions, CTM is described to potential participants as a health-promoting program	For the target population, the focus on health may be perceived as too clinical and may be a barrier to recruitment.	We strategically framed CTM as a "community gathering" during recruitment, rather than a "health program." This linguistic shift, confirmed by our team and coaches, made the program feel more social and less clinical, which reduced barriers to participation. This was a communication choice, not a change to our internal materials.		IS	Context	Format	Tailoring/tweaking	Fidelity consistent	Increase health equity or decrease disparities in EBI delivery	Participant level (OA)	N/A	Pre-implementation/planning/pilot phase	Planned/proactive	Implementer or implementation strategy expert (ST / Project team)	Organization Network system/community (all ACs) Patients or other recipients that share a particular characteristic	Yes	Incorporated into prototype CTM model for Punjabi-speaking OAs
3	N/A	During final review of the CTM participant-level evaluation, our cultural insiders expressed concerns with Eurocentric measures such as the Vancouver Index of Acculturation	Removed Vancouver Index of Acculturation from participant evaluation		EBI	Training and/or evaluation	N/A	Removing/skipping elements	Fidelity consistent	To address cultural factors	Cohort/individuals that share a particular characteristic (OA)	Recipient: Cultural norms	Pre-implementation/planning/pilot phase	Planned/proactive	Implementer or implementation strategy expert (ST / Project team)	N/A	Yes	Incorporated into prototype CTM model for Punjabi-speaking OAs

## Sheet: Lists
List of options for each module in the FRAME (blue shading) and FRAME-IS (pink shading) used in drop-down lists in sheet 1. Options applicable to both the FRAME and FRAME-IS are shaded in green. AAS: Active Aging Society, AC: Activity coach, ST: Support team, DPO: Delivery partner organization, OA: Older adult
Adaptation step	Change affects IS, EBI or both?	Module 2	Module 2b	Module 3	Module 3b	Module 4	Module 4b	Module 4c (For EBI only)	Module 5	Module 5b	Module 6	Module 7	Went as planned	Final decision
0	EBI	Content	Format	Tailoring/tweaking/refining	Fidelity consistent / Core elements or functions preserved	Increase reach or engagement	Individual	Sociopolitical (e.g., existing laws/policies)	Pre-implementation/planning/pilot phase	Planned/proactive	Political leaders	Individual participant or other recipient for whom the EBI is being implemented	Yes	Incorporated into CTM Phase 4 model
1-2	IS	Context	Setting	Changes in packaging or materials	Fidelity inconsistent / Core elements or functions changed	Increase retention	Target intervention group (OA)	Organization/setting (DPO; e.g., available resources, time constraints, cultural norms)	Implementation phase	Planned/reactive	Program leader, manager or administrator (AAS)	Group of participants or other recipients for whom the EBI is being implemented	No	Incorporated into prototype CTM model for Punjabi-speaking OAs
3	Both	Training and/or evaluation	Personnel	Adding elements	Unknown	Improve feasibility	Cohort/individuals that share a particular characteristic (OA)	Provider (AC; e.g., Cultural norms, Race/Ethnicity, first/spoken languages)	Scale up	Unplanned/reactive	Funder	Participants or other recipients that share a particular characteristic		Incorporated into final CTM model for Punjabi-speaking OAs
4		Implementation and scale-up activities	Population	Removing/skipping elements		Improve fit with participants	Individual practitioner (AC)	Recipient (OA) (e.g., Race/ethnicity, cultural norms, literacy)	Maintenance/sustainment	Other	Intervention developer/purveyor (CSU)	Individual clinician or teacher charged with implementing the EBI (AC)		Not incorporated into CTM prototype for Punjabi-speaking OAs
5			Other	Shortening/condensing		To address cultural factors	Clinic/unit level	N/A	Other		Researcher	Clinic/unit		Not incorporated into final CTM model for Punjabi-speaking OAs
6			N/A	Lengthening/extending		Improve effectiveness/outcomes	Organization (DPO)				Individual practitioners (those who deliver the EBI) (AC)	Organization
				Substituting		Reduce cost	Network system/community (all ACs)				Implementer or implementation strategy expert (ST / Project team)	Network system/community (all ACs)
				Reordering of intervention or implementation modules or segments		Increase satisfaction	Sociopolitical level				Community members	Specific implementer/facilitator
				Spreading (breaking up intervention/implementation content over several sessions)		Increase reach of the EBI	Organizational level (DPO)				Recipients (OA)	Implementation/facilitation team (ST)
				Integrating parts of the intervention into another framework (e.g., selecting elements)		Increase effectiveness of the EBI	Implementer level (ST)				Clinician(s) or teacher(s) who are being asked to use the EBI being implemented (AC)	N/A
				Integrating another treatment into the EBI (not using the whole protocol and integrating other techniques into a general EBI approach)		Increase adoption of the EBI	Clinician level (AC)				Other (DPO)
				Integrating parts of the implementation strategy into another strategy (e.g., selecting elements)		Increase acceptability, appropriateness and/or feasibility of the implementation effort	Participant level (OA)
				Integrating another strategy into the implementation strategy in primary use		Decrease costs of the implementation effort	Other
				Repeating elements or modules of the EBI or implementation strategy		Improve fidelity to the EBI	N/A
				Loosening structure		Improve sustainability of the EBI
				Departing from the EBI or implementation strategy ("drift") followed by a return to protocol/strategy within the implementation encounter		Increase health equity or decrease disparities in EBI delivery
				Drift from EBI protocol or implementation strategy without returning		Other
				Other
